# Supplementary material for: Interaction of FKBP5 Gene Variants and Adverse Life Events in Predicting Depression Onset: Results From a 10-Year Prospective Community Study
Source: Atypon-hosted journal article supplement (doi:10.1176/appi.ajp.2011.10111577), 2011-08-25
Supplement: ajp_168_10_1107_01.pdf [file ajp_168_10_1107_01.pdf]

## Supplemental Figure SF1. Representation of linkage-disequilibrium structure in the FKBP5 region using $r^2$

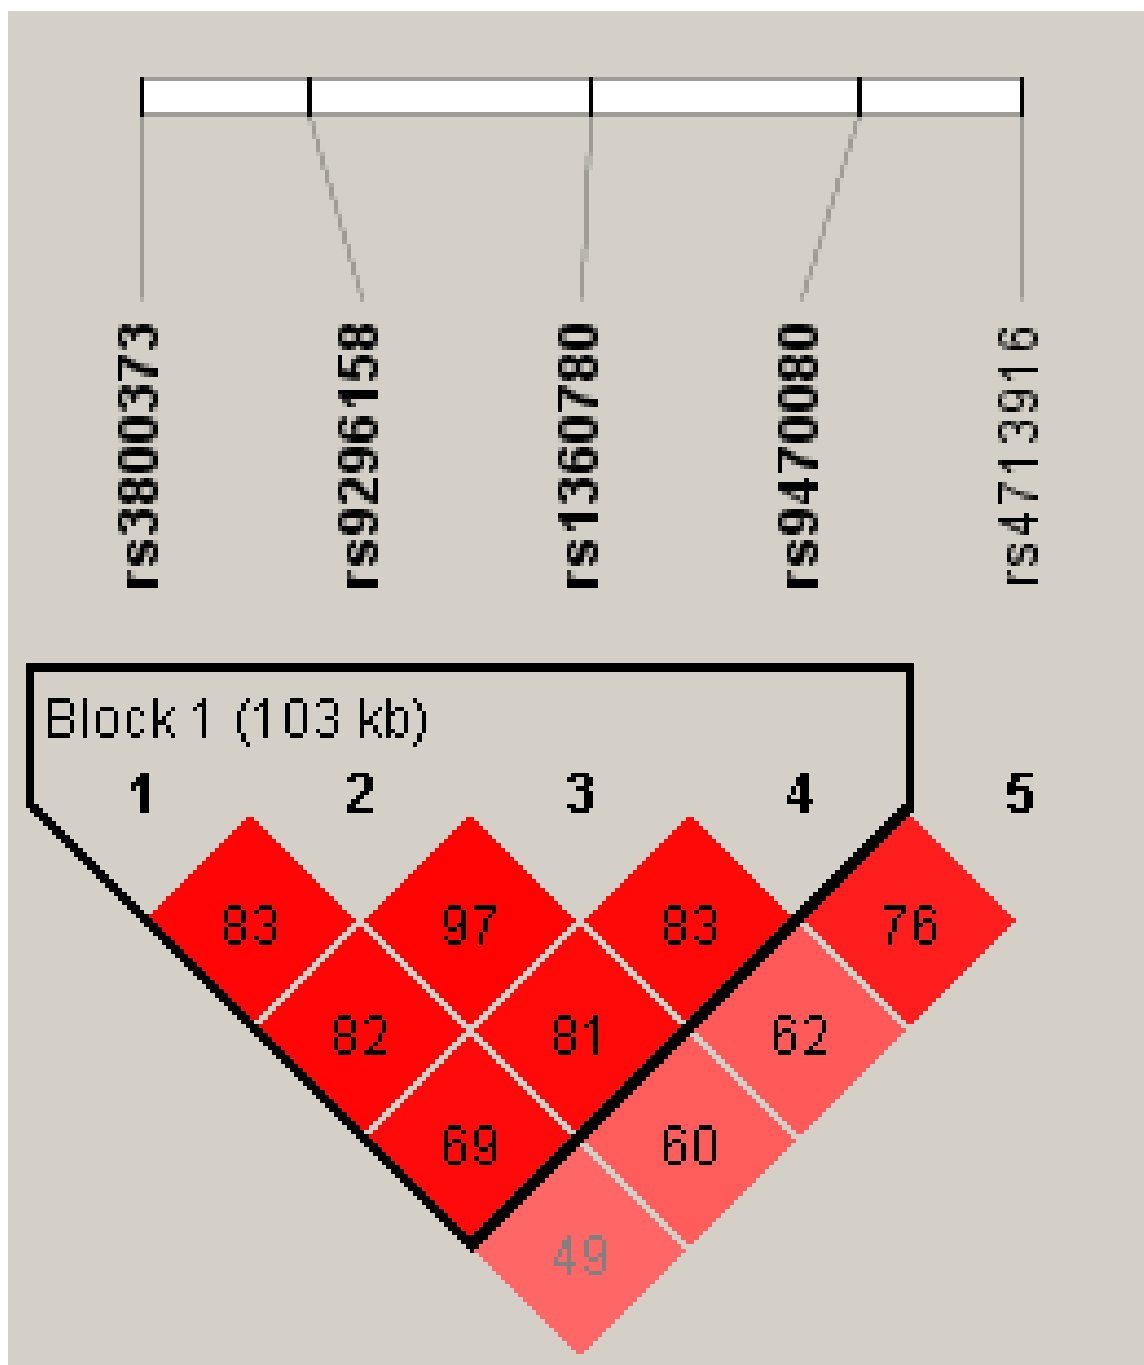

Note. The figure shows the linkage-disequilibrium plot of all tested SNPs using  $r^2$  as the measure of linkage-disequilibrium.  $r^2$  values are printed in the respective square for compared SNPs, with darker red values representing higher levels of linkage-disequilibrium.  $r^2 = 1$  would indicate complete linkage-disequilibrium.
