# Supplementary material for: Interaction of FKBP5 Gene Variants and Adverse Life Events in Predicting Depression Onset: Results From a 10-Year Prospective Community Study
Source: Atypon-hosted journal article supplement (doi:10.1176/appi.ajp.2011.10111577), 2011-08-25
Supplement: ajp_168_10_1107_02.pdf [file ajp_168_10_1107_02.pdf]

**Supplemental Table ST1. List of tested *FKBP5* SNPs, their positions on human chromosome 6 (6p21.3-21.2), Hardy-Weinberg equilibrium test p-value, minor allele frequency and call rate (N=884).** The Hardy-Weinberg equilibrium tests for the SNPs of EDSP respondents without a major depressive episode revealed a nominal deviation, which did not withstand Bonferroni correction for multiple testing (5 SNPs x 2 populations). Although call rates were close to 100%, to exclude genotyping errors we compared the genotypes of rs1360780 and rs9470080 with results of high-throughput genotyping (Illumina 550k Bead Chip, Illumina Inc., San Diego, CA, USA), which is available for these SNPs in a subsample of 169 respondents. 100% concordance in genotyping was observed.

| SNP       | Position <sup>a</sup> | Function                      | Major Depressive Episode                |                        |           | No Major Depressive Episode             |                        |           |
|-----------|-----------------------|-------------------------------|-----------------------------------------|------------------------|-----------|-----------------------------------------|------------------------|-----------|
|           |                       |                               | Hardy-Weinberg-Equilibrium test p-value | Minor Allele Frequency | Call Rate | Hardy-Weinberg-Equilibrium test p-value | Minor Allele Frequency | Call Rate |
| rs3800373 | 35650454              | 3' UTR                        | 0.185                                   | 0.27                   | 99.37     | 0.024*                                  | 0.25                   | 99.72     |
| rs9296158 | 35675060              | Intron                        | 0.247                                   | 0.29                   | 100.00    | 0.007*                                  | 0.28                   | 100.00    |
| rs1360780 | 35715549              | Intron                        | 0.163                                   | 0.28                   | 100.00    | 0.013*                                  | 0.29                   | 100.00    |
| rs9470080 | 35754413              | Intron                        | 0.570                                   | 0.30                   | 100.00    | 0.045*                                  | 0.32                   | 100.00    |
| rs4713916 | 35777961-8002         | 5' flanking (range inserting) | 0.800                                   | 0.27                   | 100.00    | 0.031*                                  | 0.30                   | 99.86     |

a Chromosomal positions are given according to the March 2006 (hg18) human reference sequence database (NCBI Build 36.1) of the International Human Genome Sequencing Consortium;

\*  $p < 0.05$ ; for all SNPs: no significant deviation from Hardy-Weinberg-Equilibrium after Bonferroni-correction for multiple testing (5 SNPs\* 2 populations).

**Supplemental Table ST2. Associations between baseline adverse events and SNPs of the *FKBP5* gene.** Presence of potential gene-environment correlations were tested by evaluating the association between *FKBP5* polymorphisms and the exposure to adverse events. Associations at the nominal level of significance were almost exclusively found for rs4713916 with carriers of the major allele (AG/GG) being less frequently exposed to adverse events compared to non-carriers (AA). No effect withstood correction for multiple testing.

| Lifetime Adverse Event until Baseline   | Proportion of Respondents<br>with Respective Adverse Event <sup>c</sup> among ... |                |                          |                |                                                |                | Heterozygous Versus<br>Homozygous for Minor<br>Allele |                    | Homozygous for Major<br>Allele Versus<br>Homozygous for Minor<br>Allele |                    | Heterozygous Versus<br>Homozygous for Major<br>Allele |                    |
|-----------------------------------------|-----------------------------------------------------------------------------------|----------------|--------------------------|----------------|------------------------------------------------|----------------|-------------------------------------------------------|--------------------|-------------------------------------------------------------------------|--------------------|-------------------------------------------------------|--------------------|
|                                         | Subjects<br>Homozygous for<br>the Minor Allele                                    |                | Heterozygous<br>Subjects |                | Subjects<br>Homozygous for<br>the Major Allele |                | Odds Ratio <sup>a</sup>                               | 95%CI <sup>a</sup> | Odds Ratio <sup>a</sup>                                                 | 95%CI <sup>a</sup> | Odds Ratio <sup>a</sup>                               | 95%CI <sup>a</sup> |
|                                         | n <sup>a</sup>                                                                    | % <sup>a</sup> | n <sup>a</sup>           | % <sup>a</sup> | n <sup>a</sup>                                 | % <sup>a</sup> |                                                       |                    |                                                                         |                    |                                                       |                    |
| <b>rs3800373 (CC/AC/AA)<sup>b</sup></b> |                                                                                   |                |                          |                |                                                |                |                                                       |                    |                                                                         |                    |                                                       |                    |
| Any Adverse Event                       | 29                                                                                | 40.3           | 102                      | 33.4           | 166                                            | 32.9           | 0.8                                                   | 0.46-1.36          | 0.8                                                                     | 0.45-1.28          | 1.0                                                   | 0.76-1.41          |
| Any Separation Event                    | 19                                                                                | 26.4           | 73                       | 23.9           | 130                                            | 25.8           | 0.9                                                   | 0.51-1.68          | 1.0                                                                     | 0.57-1.78          | 0.9                                                   | 0.65-1.29          |
| Any Trauma                              | 14                                                                                | 19.4           | 43                       | 14.1           | 61                                             | 12.1           | 0.7                                                   | 0.37-1.46          | 0.6                                                                     | 0.31-1.17          | 1.2                                                   | 0.79-1.87          |
| Any Severe Trauma                       | 11                                                                                | 15.3           | 32                       | 10.5           | 47                                             | 9.3            | 0.7                                                   | 0.33-1.49          | 0.6                                                                     | 0.29-1.23          | 1.2                                                   | 0.72-1.90          |
| <b>rs9296158 (AA/AG/GG)<sup>b</sup></b> |                                                                                   |                |                          |                |                                                |                |                                                       |                    |                                                                         |                    |                                                       |                    |
| Any Adverse Event                       | 38                                                                                | 42.7           | 102                      | 31.5           | 158                                            | 33.6           | 0.7                                                   | 0.40-1.07          | 0.7                                                                     | 0.44-1.13          | 0.9                                                   | 0.68-1.26          |
| Any Separation Event                    | 26                                                                                | 29.2           | 74                       | 22.8           | 123                                            | 26.1           | 0.8                                                   | 0.44-1.29          | 0.9                                                                     | 0.53-1.47          | 0.9                                                   | 0.61-1.20          |
| Any Trauma                              | 18                                                                                | 20.2           | 41                       | 12.7           | 59                                             | 12.5           | 0.6                                                   | 0.33-1.16          | 0.6                                                                     | 0.33-1.09          | 1.0                                                   | 0.67-1.60          |
| Any Severe Trauma                       | 15                                                                                | 16.9           | 29                       | 9.0            | 46                                             | 9.8            | 0.5                                                   | 0.26-1.04          | 0.6                                                                     | 0.29-1.07          | 0.9                                                   | 0.57-1.53          |
| <b>rs1360780 (TT/CT/CC)<sup>b</sup></b> |                                                                                   |                |                          |                |                                                |                |                                                       |                    |                                                                         |                    |                                                       |                    |
| Any Adverse Event                       | 39                                                                                | 43.3           | 105                      | 32.1           | 154                                            | 33.0           | 0.7                                                   | 0.40-1.06          | 0.7                                                                     | 0.41-1.07          | 1.0                                                   | 0.72-1.33          |
| Any Separation Event                    | 27                                                                                | 30.0           | 75                       | 22.9           | 121                                            | 25.9           | 0.7                                                   | 0.43-1.24          | 0.8                                                                     | 0.51-1.39          | 0.9                                                   | 0.62-1.22          |
| Any Trauma                              | 18                                                                                | 20.0           | 43                       | 13.2           | 57                                             | 12.2           | 0.7                                                   | 0.35-1.22          | 0.6                                                                     | 0.32-1.06          | 1.1                                                   | 0.72-1.72          |
| Any Severe Trauma                       | 15                                                                                | 16.7           | 30                       | 9.2            | 45                                             | 9.6            | 0.5                                                   | 0.27-1.07          | 0.6                                                                     | 0.29-1.06          | 1.0                                                   | 0.59-1.60          |
| <b>rs9470080 (TT/CT/CC)<sup>b</sup></b> |                                                                                   |                |                          |                |                                                |                |                                                       |                    |                                                                         |                    |                                                       |                    |
| Any Adverse Event                       | 41                                                                                | 39.8           | 112                      | 31.4           | 145                                            | 34.2           | 0.7                                                   | 0.45-1.14          | 0.8                                                                     | 0.51-1.27          | 0.9                                                   | 0.65-1.21          |
| Any Separation Event                    | 29                                                                                | 28.2           | 81                       | 22.7           | 113                                            | 26.7           | 0.8                                                   | 0.47-1.28          | 0.9                                                                     | 0.58-1.54          | 0.8                                                   | 0.58-1.14          |
| Any Trauma                              | 20                                                                                | 19.4           | 45                       | 12.6           | 53                                             | 12.5           | 0.6                                                   | 0.35-1.14          | 0.6                                                                     | 0.34-1.10          | 1.0                                                   | 0.66-1.58          |
| Any Severe Trauma                       | 17                                                                                | 16.5           | 32                       | 9.0            | 41                                             | 9.7            | 0.5 *                                                 | 0.27-0.99          | 0.6                                                                     | 0.30-1.04          | 0.9                                                   | 0.57-1.53          |
| <b>rs4713916 (AA/AG/GG)<sup>b</sup></b> |                                                                                   |                |                          |                |                                                |                |                                                       |                    |                                                                         |                    |                                                       |                    |
| Any Adverse Event                       | 39                                                                                | 44.8           | 109                      | 31.9           | 150                                            | 33.0           | 0.6 *                                                 | 0.36-0.96          | 0.6 *                                                                   | 0.38-0.99          | 1.0                                                   | 0.70-1.29          |
| Any Separation Event                    | 29                                                                                | 33.3           | 79                       | 23.1           | 115                                            | 25.3           | 0.6 *                                                 | 0.36-1.02          | 0.7                                                                     | 0.41-1.13          | 0.9                                                   | 0.64-1.24          |
| Any Trauma                              | 19                                                                                | 21.8           | 43                       | 12.6           | 56                                             | 12.3           | 0.5 *                                                 | 0.28-0.97          | 0.5 *                                                                   | 0.28-0.93          | 1.0                                                   | 0.67-1.58          |
| Any Severe Trauma                       | 16                                                                                | 18.4           | 31                       | 9.1            | 43                                             | 9.5            | 0.5 *                                                 | 0.23-0.88          | 0.5 *                                                                   | 0.24-0.89          | 1.0                                                   | 0.59-1.57          |

a "n" and "%" = number and percentage of respondents; "Odds Ratio" = odds ratio of a multiple logistic regression; "CI" = confidence interval;

b Minor alleles: rs3800373: C; rs9296158: A; rs1360780: T; rs9470080: T; rs4713916: A;

c Reference group: without the respective adverse event until baseline;

\* p < 0.05 for an odds ratio controlled for age and gender; no effect withstood correction for multiple testing.
